# Supplementary material for: Controlling Tumor Growth by Modulating Endogenous Production of Reactive Oxygen Species
Source: Oxford University Press journal article supplement (doi:10.1158/0008-5472.948.65.3), 2005-02-01
Supplement: 041796-sup-supplementary_figure_1.pdf [file 041796-sup-supplementary_figure_1.pdf]

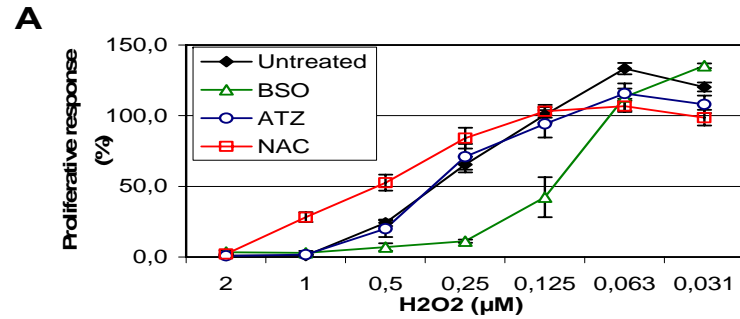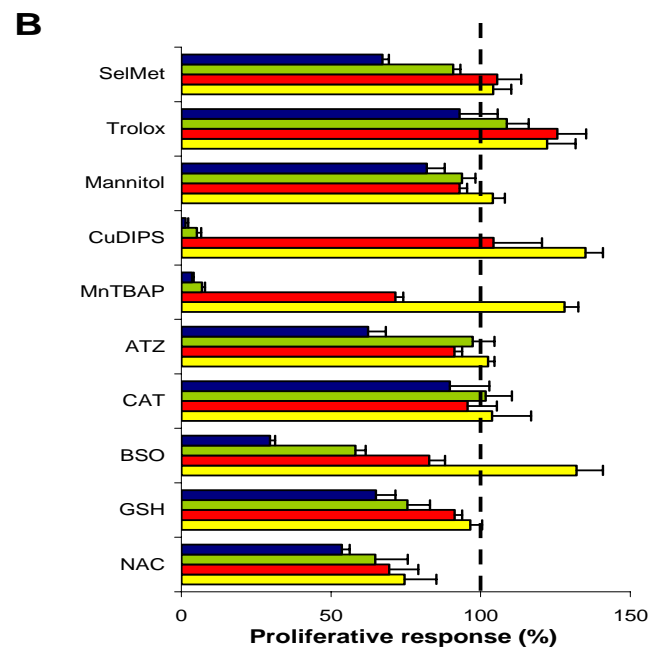

**Supplemental Figure 1 : (A)** Cytostatic effects of exogenous H<sub>2</sub>O<sub>2</sub> on non-transformed human umbilical vein endothelial cells in vitro. Briefly, 5x10<sup>4</sup> cells/well were seeded in 96-well plates in culture medium supplemented or not with either NAC (400μM) or ATZ (400μM) or BSO (400μM). Serial dilutions of H<sub>2</sub>O<sub>2</sub> were added to the cells for 48 hrs. The cytostatic effects of H<sub>2</sub>O<sub>2</sub> were determined by thymidine incorporation. Results are expressed as % cpm ± SEM versus cells in culture medium alone. **(B)** Effects of antioxidant molecules on the in vitro proliferative rate of HUVEC non transformed cells. Cells (2 x 10<sup>4</sup> cells/well) were seeded in 96-well plates and incubated for 48 hours in complete medium with ■: 50μM, ■: 100μM, ■: 200μM, ■: 400μM of pharmacological modulators of antioxidant enzymes. Cell proliferation was evaluated by thymidine incorporation. Results are expressed as % cpm ± SEM versus control cells in culture medium alone (dotted line). Data (A,B) from at least three independent experiments have been pooled.
